# Supplementary material for: Spectroscopic properties of Zn(salphenazine) complexes and their application in small molecule organic solar cells
Source: Royal Society of Chemistry journal article supplement (doi:10.1039/c3dt52034j), 2013-10-11

ESI for:

## Spectroscopic Properties of Zn(Salphenazine) Complexes and their Application in Small Molecule Solar Cells

Giovanni Salassa,<sup>a</sup> James W. Ryan,<sup>a</sup> Eduardo C. Escudero-Adán,<sup>a</sup> and Arjan W. Kleij\*<sup>a,b</sup>

<sup>a</sup> Institute of Chemical Research of Catalonia (ICIQ), Av. Països Catalans  
16, 43007 – Tarragona (Spain). E-mail: akleij@iciq.es; Fax: +34 977920828; Tel: +34 977920247.

<sup>b</sup> Catalan Institute for Research and Advanced Studies (ICREA), Pg. Lluís  
Companys 23, 08010, Barcelona, Spain.

### CONTENTS:

|           |                                                                         |
|-----------|-------------------------------------------------------------------------|
| Page S2:  | Extension of parts of the DFT-calculated structure for complex <b>9</b> |
| Page S4:  | Figure S1.                                                              |
| Page S5:  | Figure S2.                                                              |
| Page S6:  | Figure S3.                                                              |
| Page S7:  | EDDMs of transitions 7, 13 and 14 for complex <b>1</b> ·THF.            |
| Page S9:  | TD-DFT and relative EDDMs of transitions 1-4 for complex <b>10</b> ·THF |
| Page S12: | Cyclic voltammetry for complex <b>1</b> .                               |
| Page S13: | NMR spectra (copies) for complexes <b>1, 2, 3, 5, 8</b> and <b>9</b> .  |
| Page S29: | Representative MALDI(+) MS spectra.                                     |

Extension of parts of the DFT-calculated structure for complex **9**:

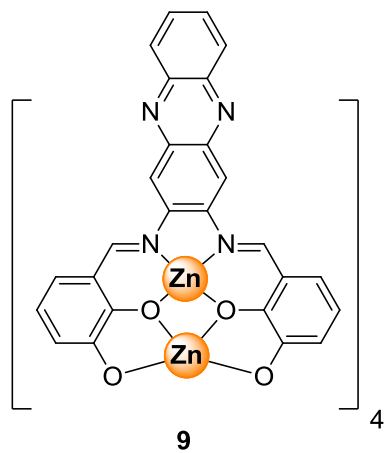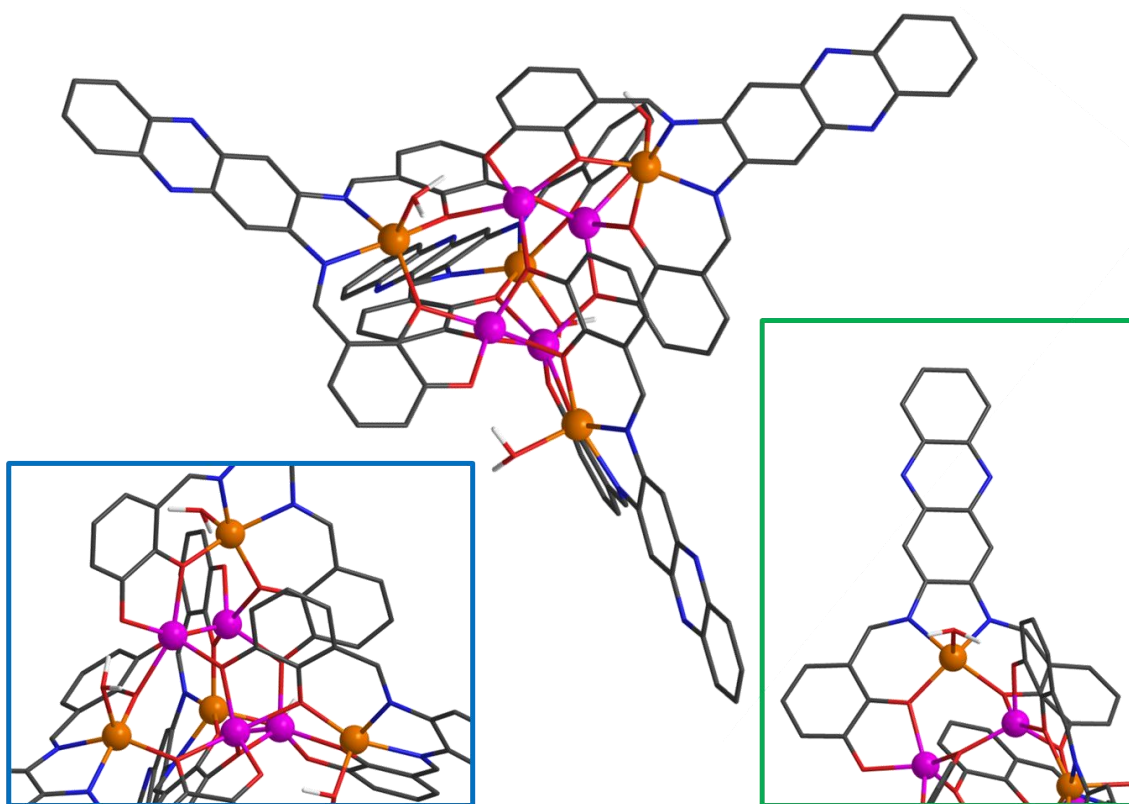

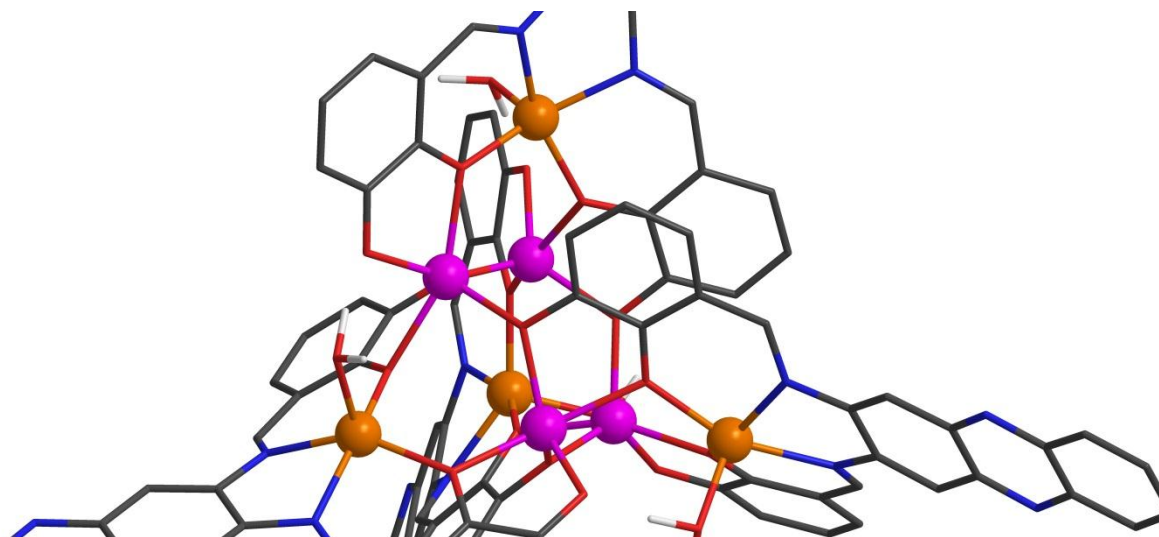

Central part of the structure showing the octanuclear  $Zn_8$  core. Zn atoms in purple and orange.

Figure S1:

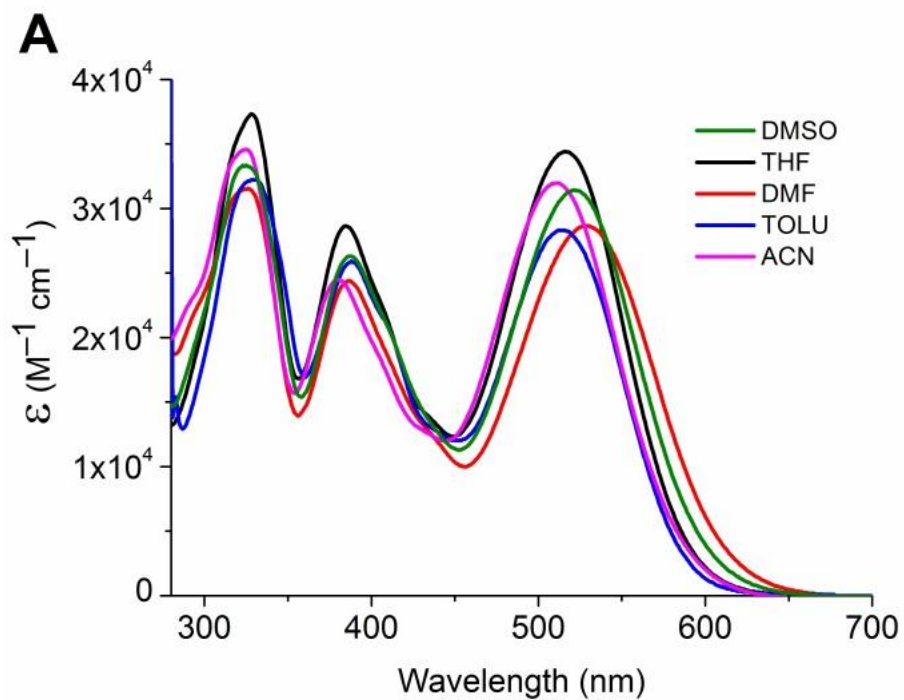

**Figure S1:** Comparison between absorption spectra of **1** in different solvents at a concentration of  $1 \times 10^{-5}$  M.

Figure S2:

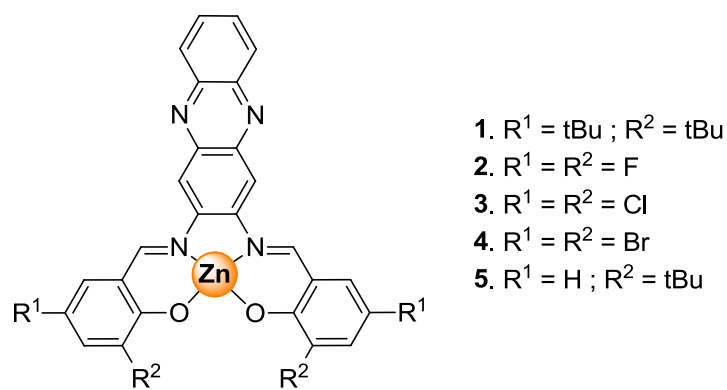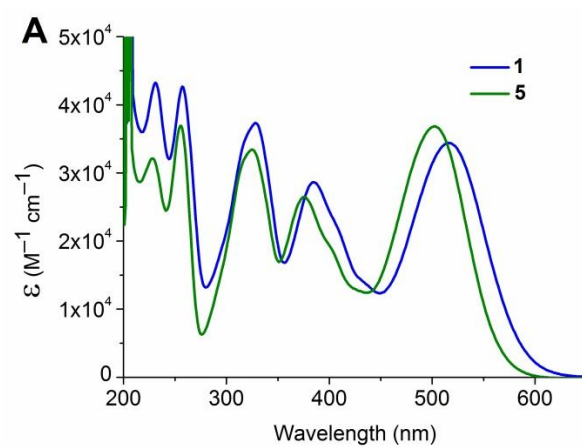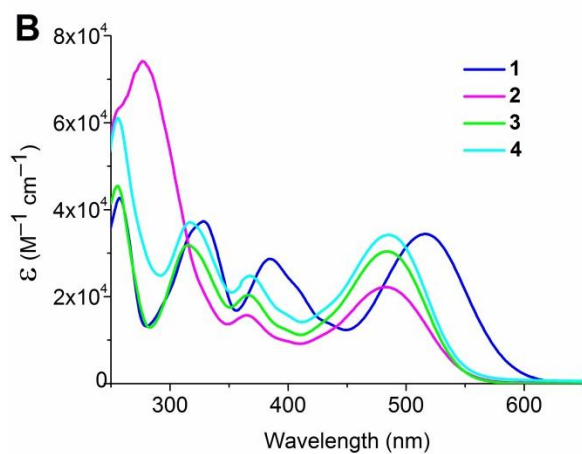

**Figure S2:** UV-Vis comparisons: **(A)** between di-substituted **5** and tetra-substituted **1**; **(B)** comparison between tetra-substituted complexes **1-4**. All UV-Vis spectra were recorded in THF at a concentration of  $1 \times 10^{-5}$  M.

Figure S3: UV-Vis comparisons between di-substituted complexes **5-7**:

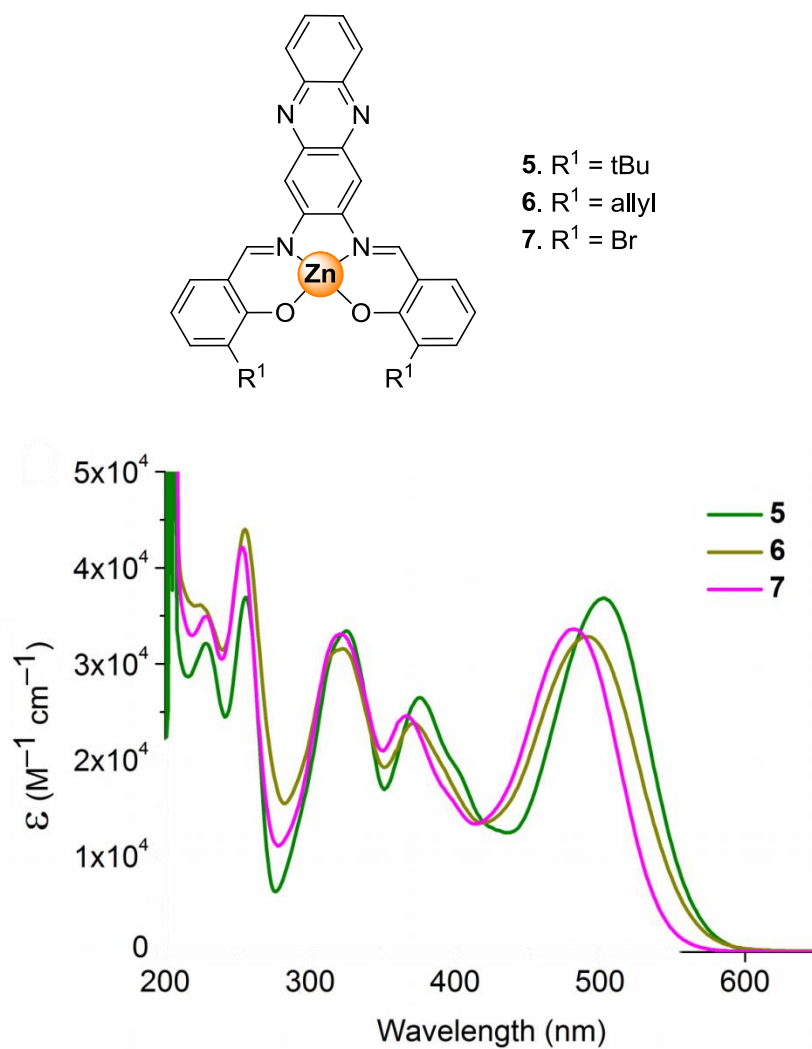

Figure S3: UV-Vis comparisons between di-substituted complexes **5-7**.

EDDMs of transitions 7, 13 and 14 for complex **1**·THF:

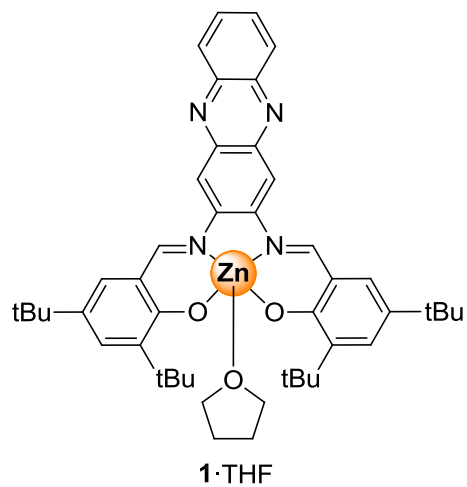

**Transition 7:**

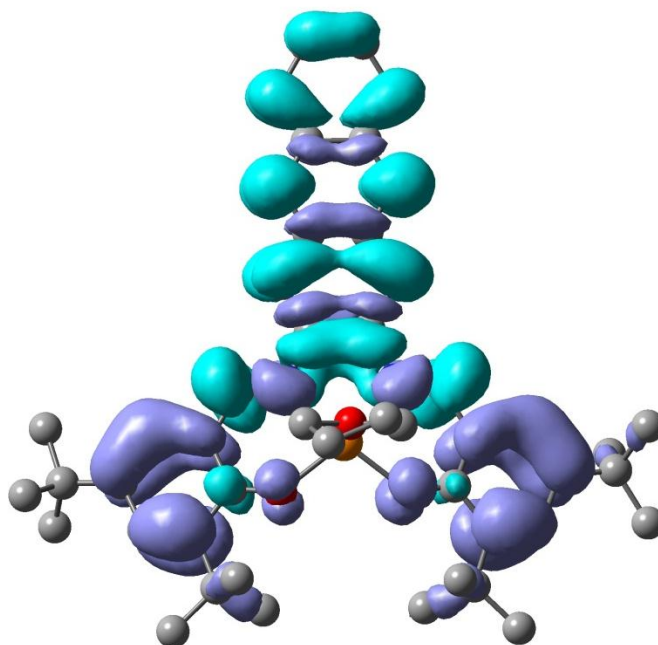

Energy = 3.18 eV (389 nm)

$f = 0.92$ ; H-3→LUMO (69%)

**Transition 13:**

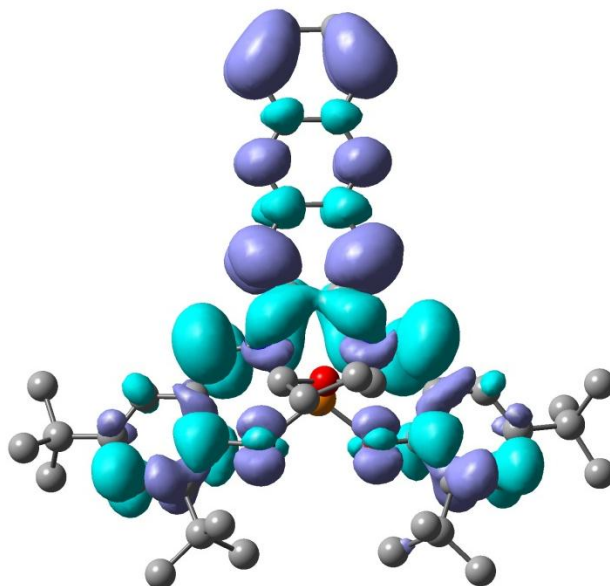

Energy = 3.79 eV (327 nm)

$f = 0.48$ ; H-2→L+1 (75%)

**Transition 14:**

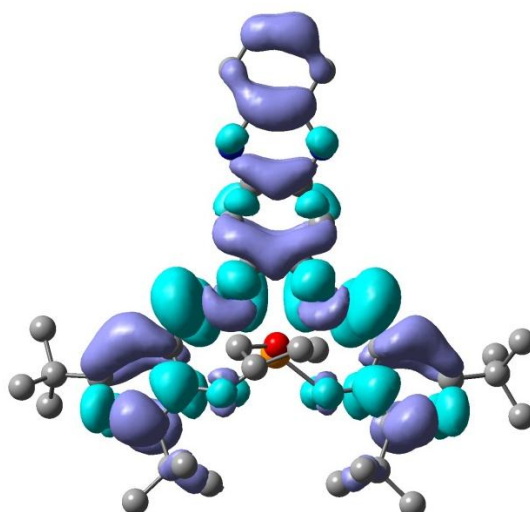

Energy = 3.94 eV (315 nm)

$f = 0.36$ ; H-3→L+1 (75%)



Calculated absorption spectra and relative EDDMs of transitions 1-4 for complex **10**·THF:

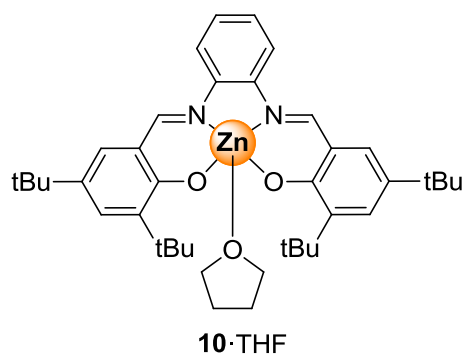

The calculated spectra of complex **10** (vide infra), even though slightly overestimates the energy of the transitions, shows that the lowest absorption band is formed by 4 different transitions (EDDMs next page). In particular it has been observed that transition 2 (398 nm page S10) has a  $\pi$ - $\pi^*$  character with the electron density migrates from the two phenyl side groups towards the phenyl backbone. This type of transition, characterized by a charge transfer, is equivalent to the transition 2 in complex **1** (511 nm, see **Fig 8C**) but in the case of the latter the more extended  $\pi$ -system of the phenazine provoke a red-shift. Same considerations can be done for transition 3 of complex **10** (389 nm, see page S11) and transition 7 (395 nm, see page S7) of **1**, but in this case the transitions are characterized by  $\pi$ - $\pi^*$  with no charge transfer character. Since this reason the more extended  $\pi$ -conjugated system of **1** causes a blue-shift of this transition.

#### TD-DFT Calculate spectra of **10**

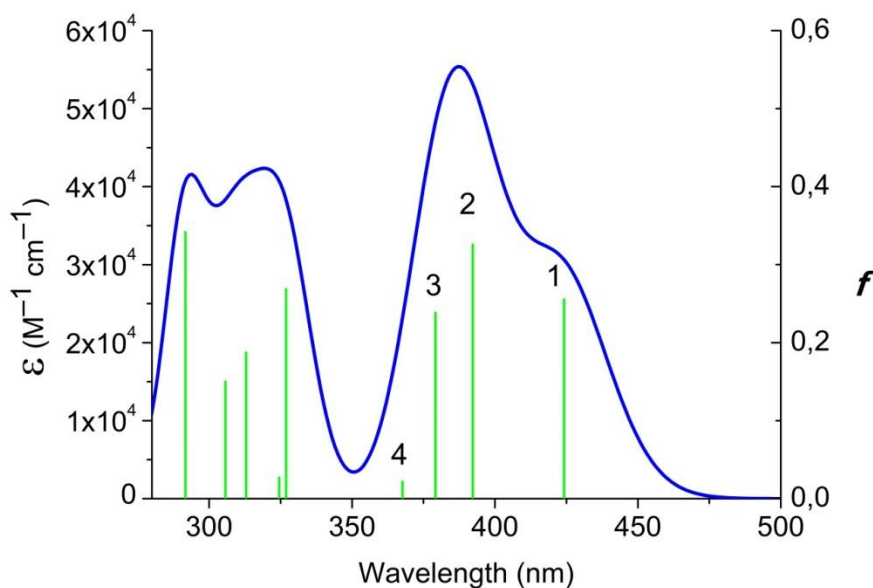

**Transition 1:**

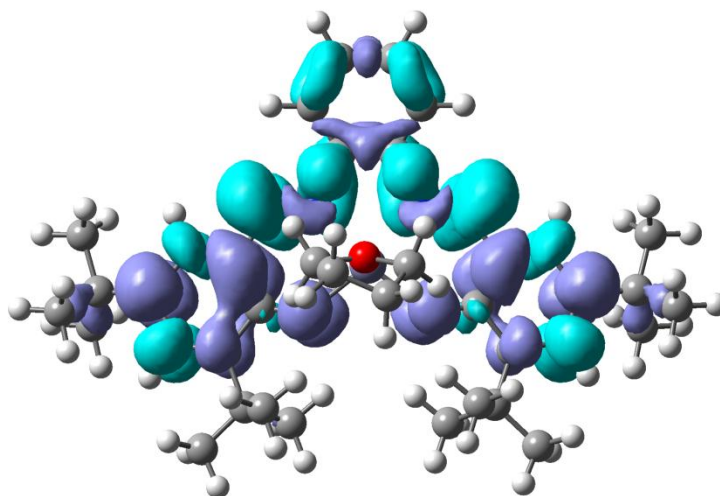

Energy = 2.92 eV (424 nm)

$f = 0.26$ ; HOMO→LUMO (87%)

**Transition 2:**

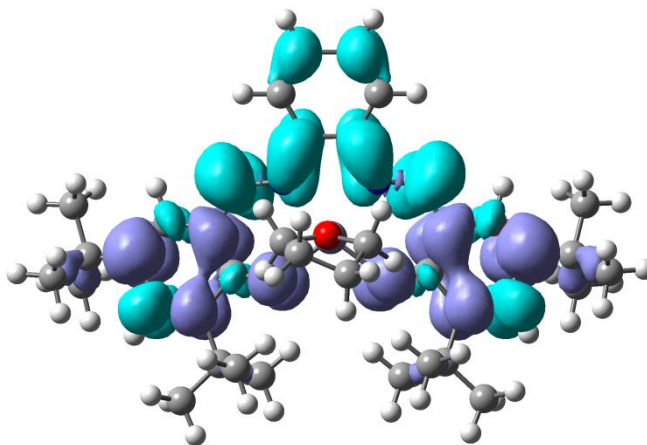

Energy = 3.16 eV (398 nm)

$f = 0.33$ ; H-1→LUMO (92%)

**Transition 3:**

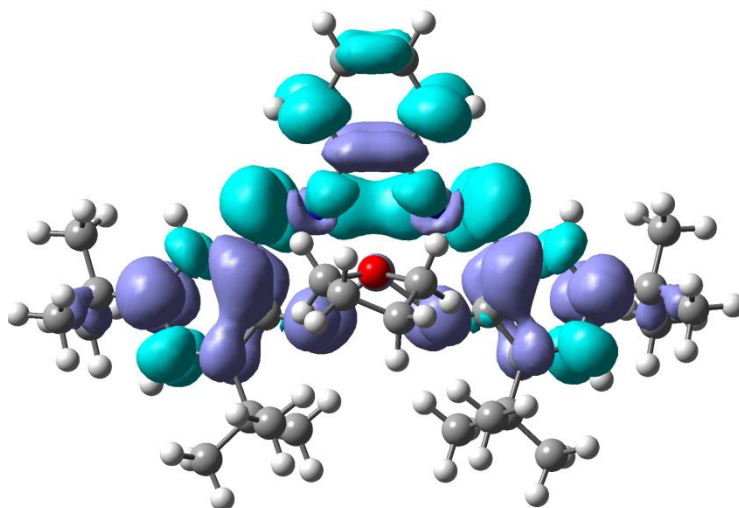

Energy = 3.27 eV (395 nm)

$f = 0.32$ ; HOMO $\rightarrow$ L+1 (93%)

**Transition 4:**

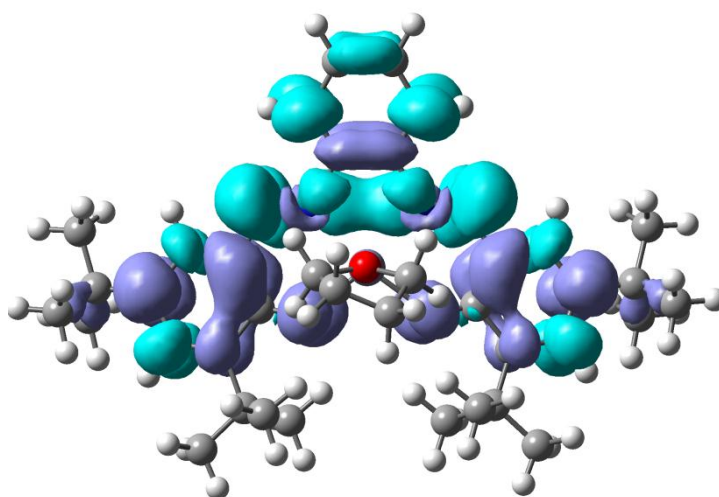

Energy = 3.37 eV (368 nm)

$f = 0.02$ ; H-1 $\rightarrow$ L+1 (87%)

## Cyclic voltammetry for complex **1**:

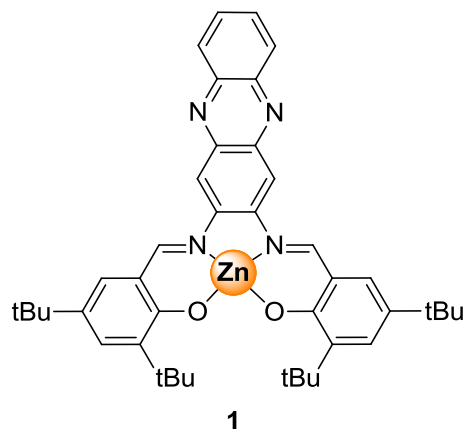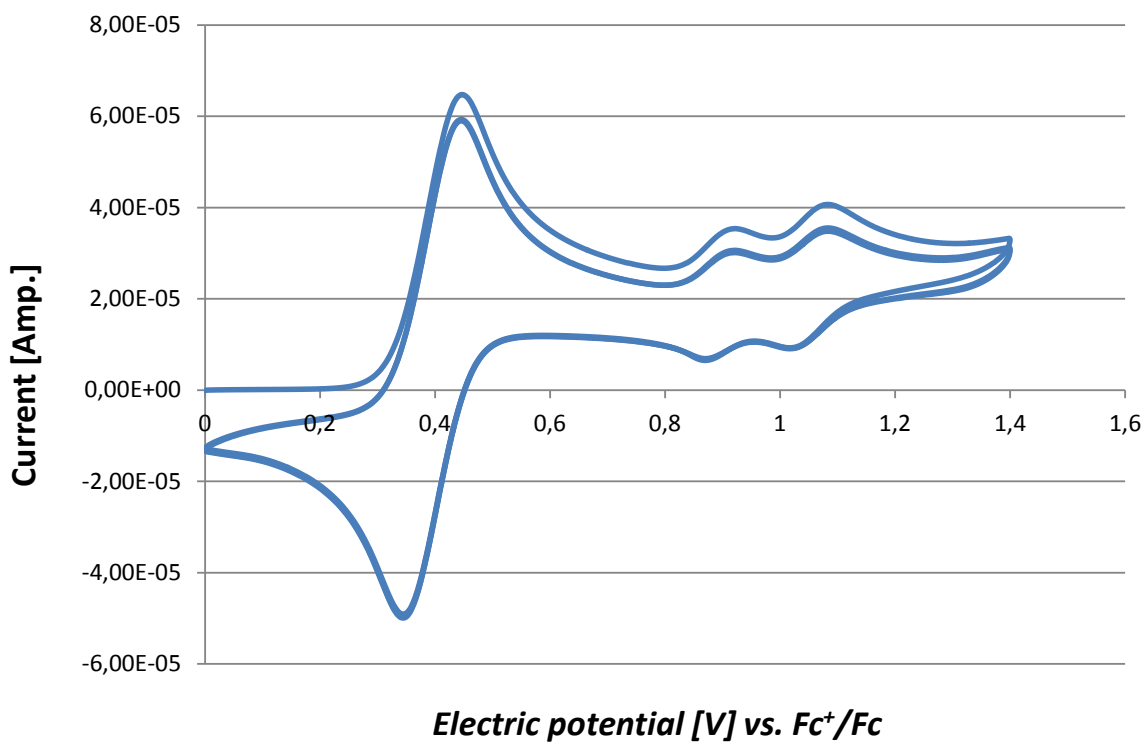

Conditions used: degassed CH<sub>3</sub>CN, r.t., NBu<sub>4</sub>PF<sub>6</sub> (0.1 M) as electrolyte. See further the experimental conditions in the main text described under “Differential Pulse Voltammetry” in the Experimental section.

NMR spectra (copies) for complexes **1**, **2**, **3**, **5**, **8** and **9**:

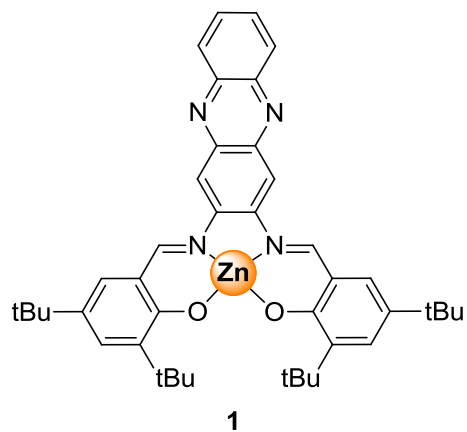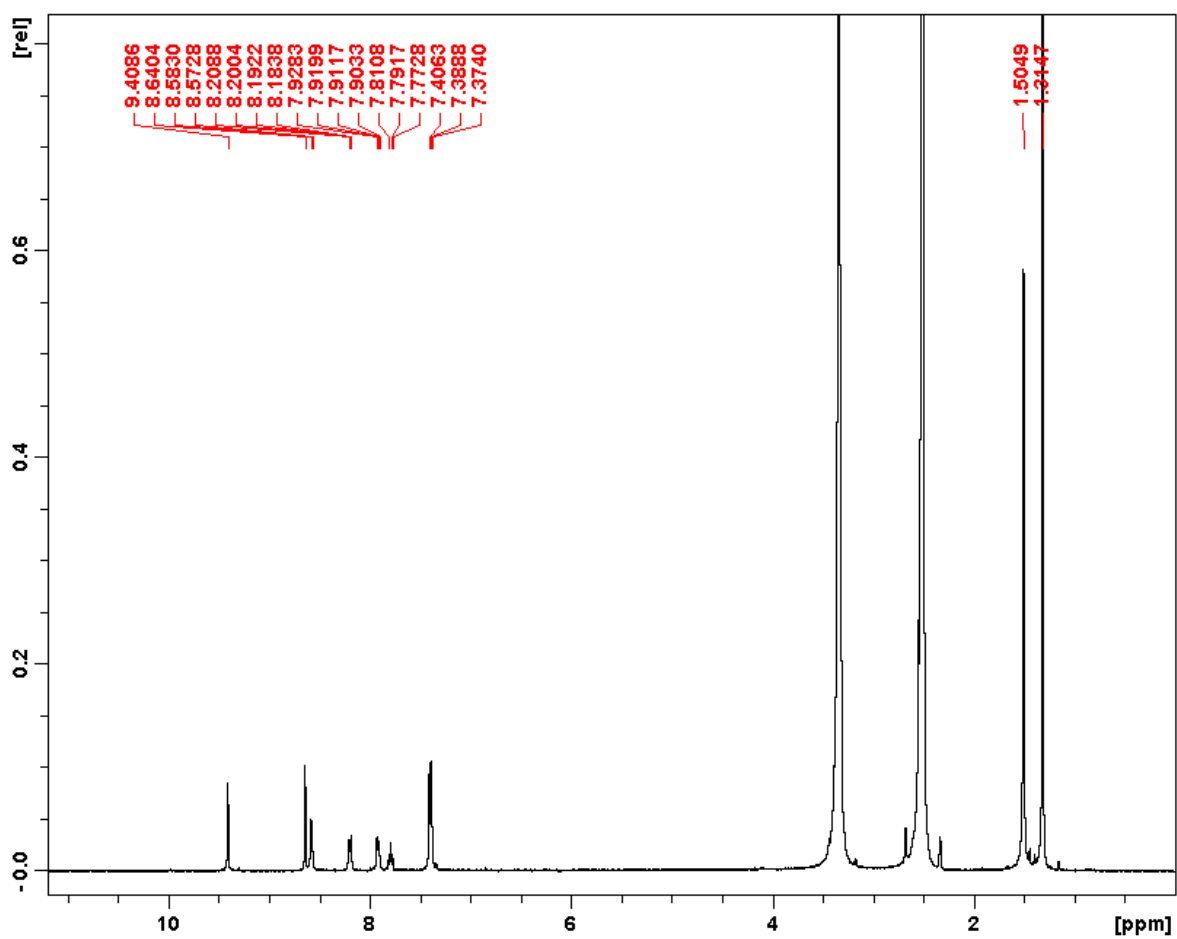

Full NMR trace (DMSO-*d*<sub>6</sub>)

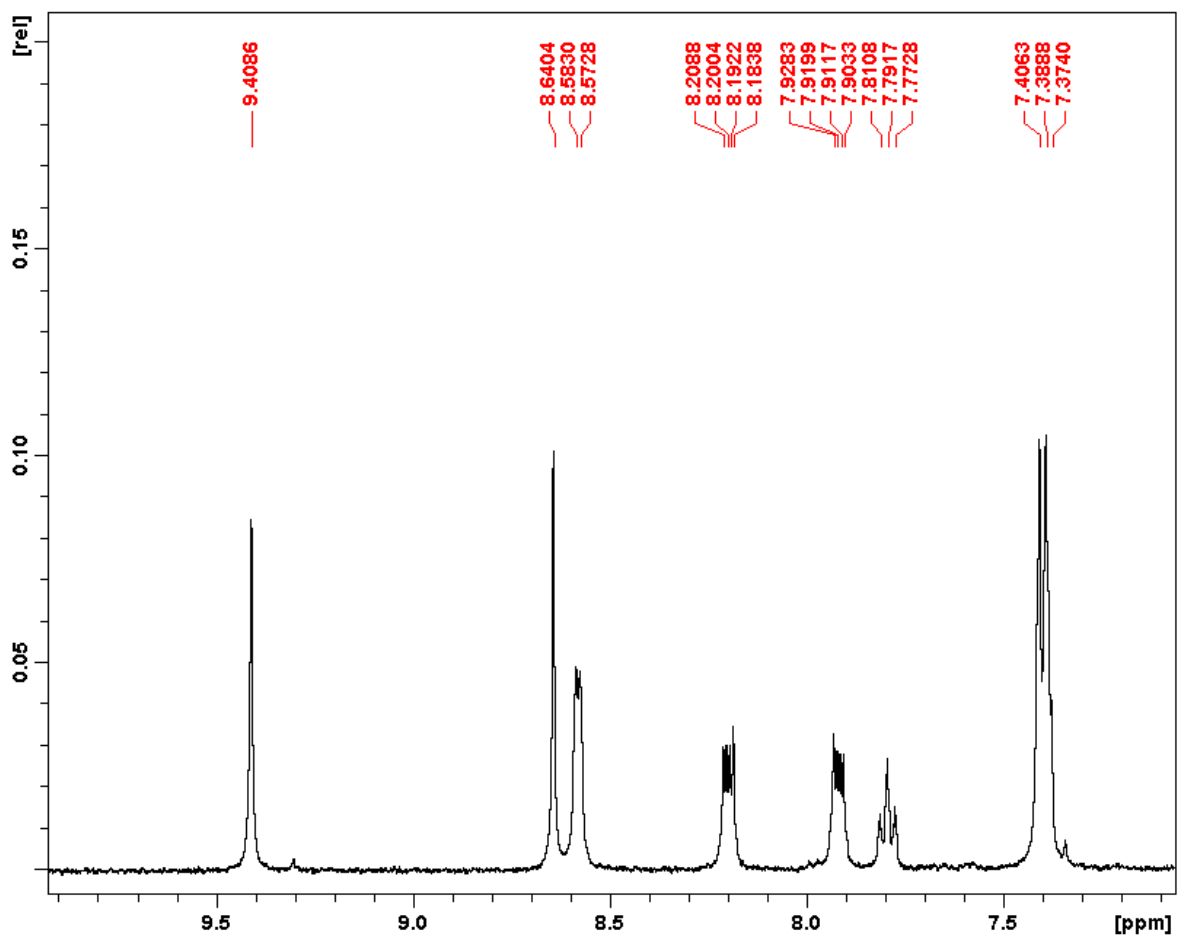

Aromatic region (DMSO-*d*<sub>6</sub>)

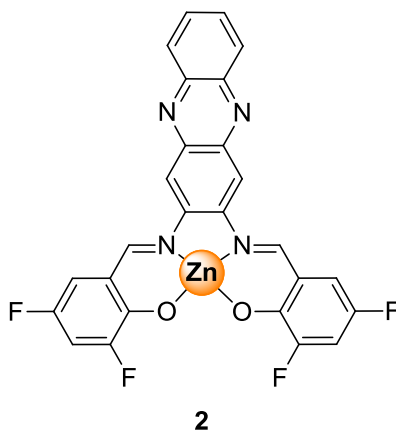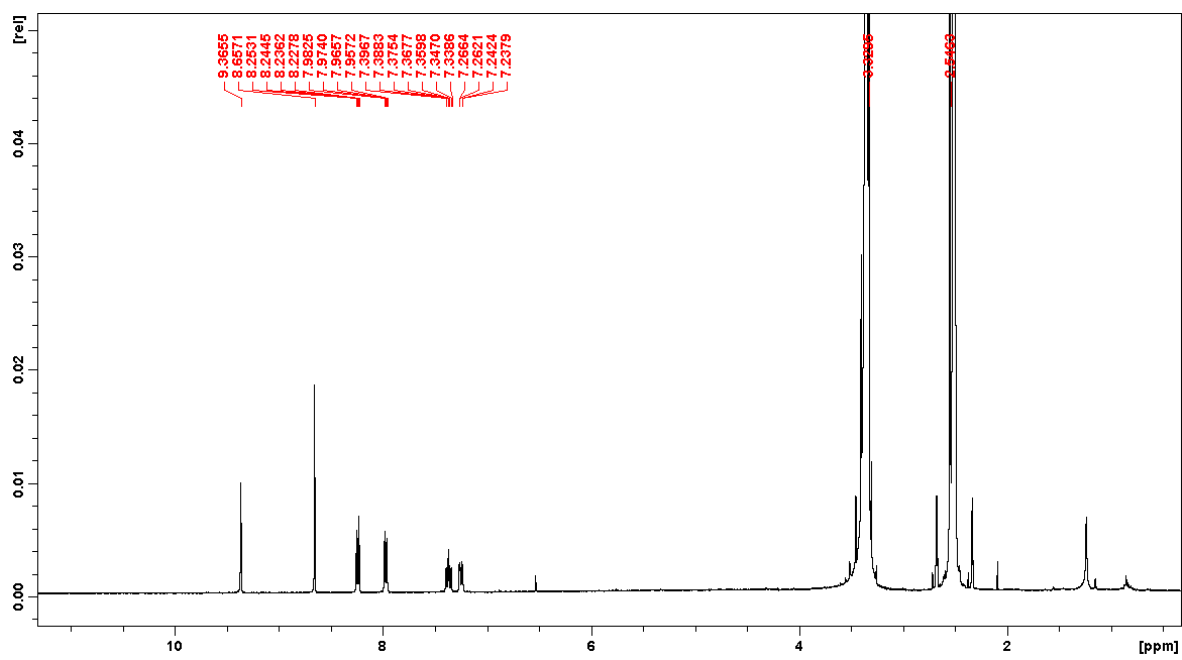

Full NMR trace (DMSO- $d_6$ )

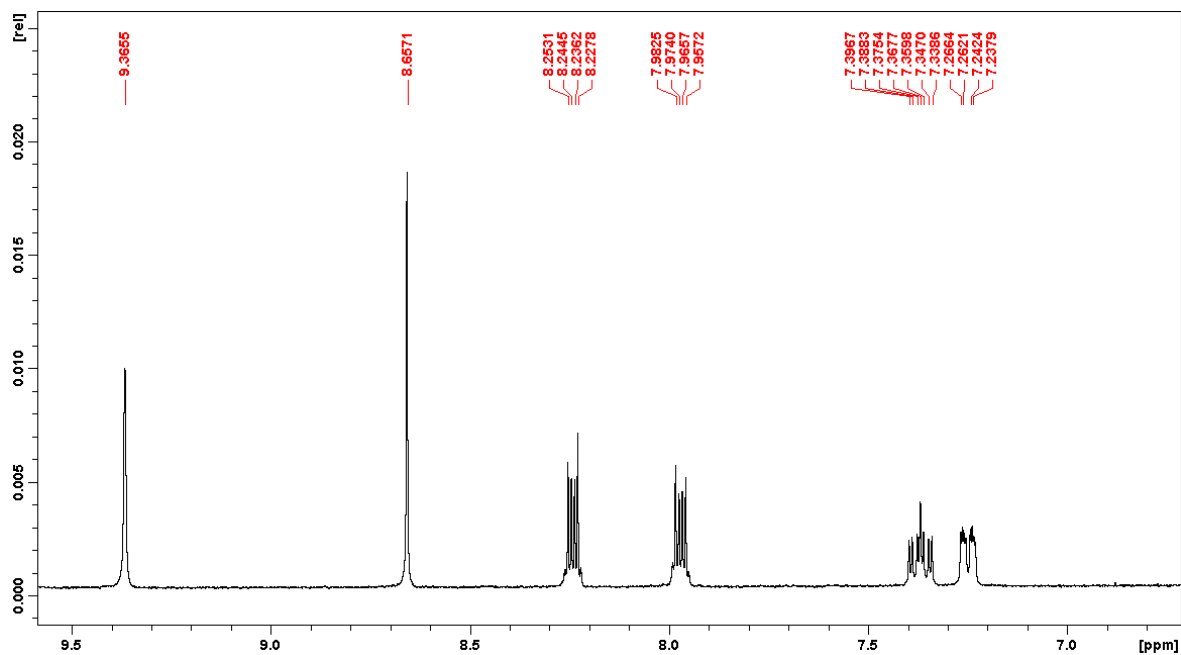

Aromatic region (DMSO-*d*<sub>6</sub>)

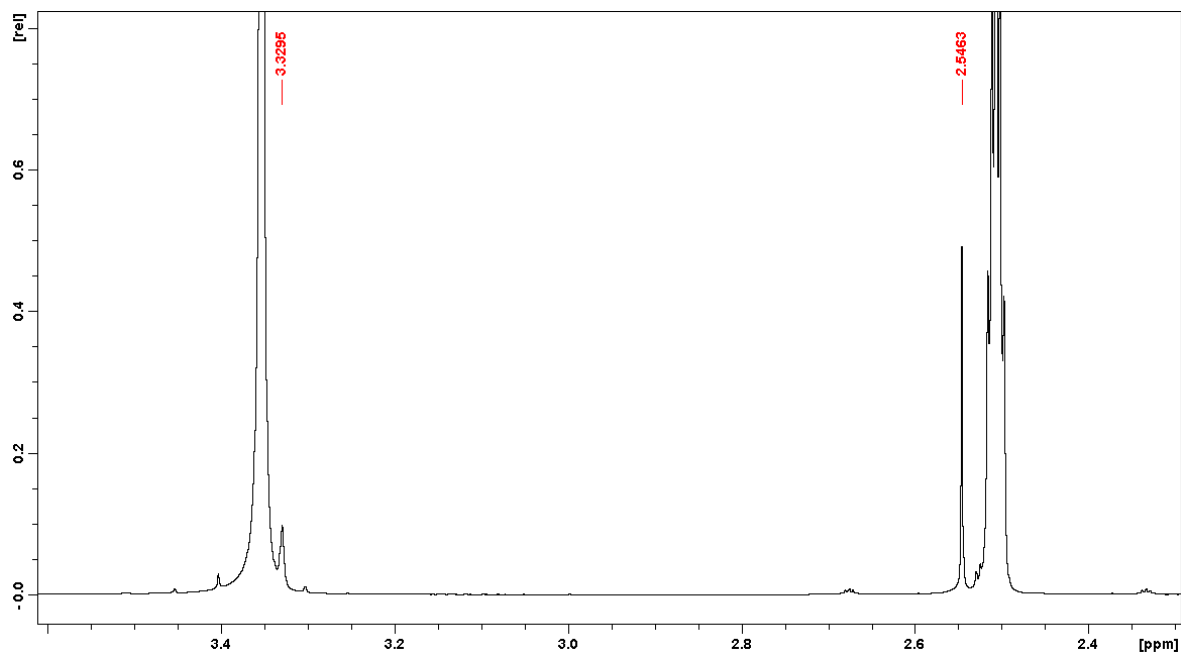

Aliphatic region: the peaks at  $\delta = 3.33$  and 2.55 ppm indicate MeOH and DMSO solvent impurities.



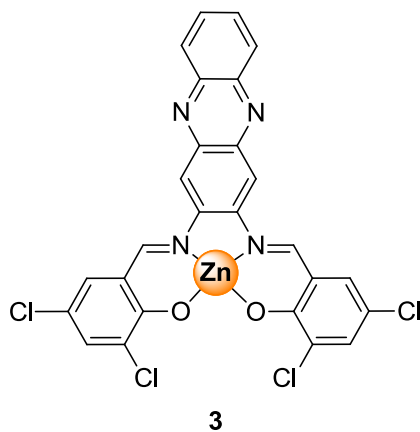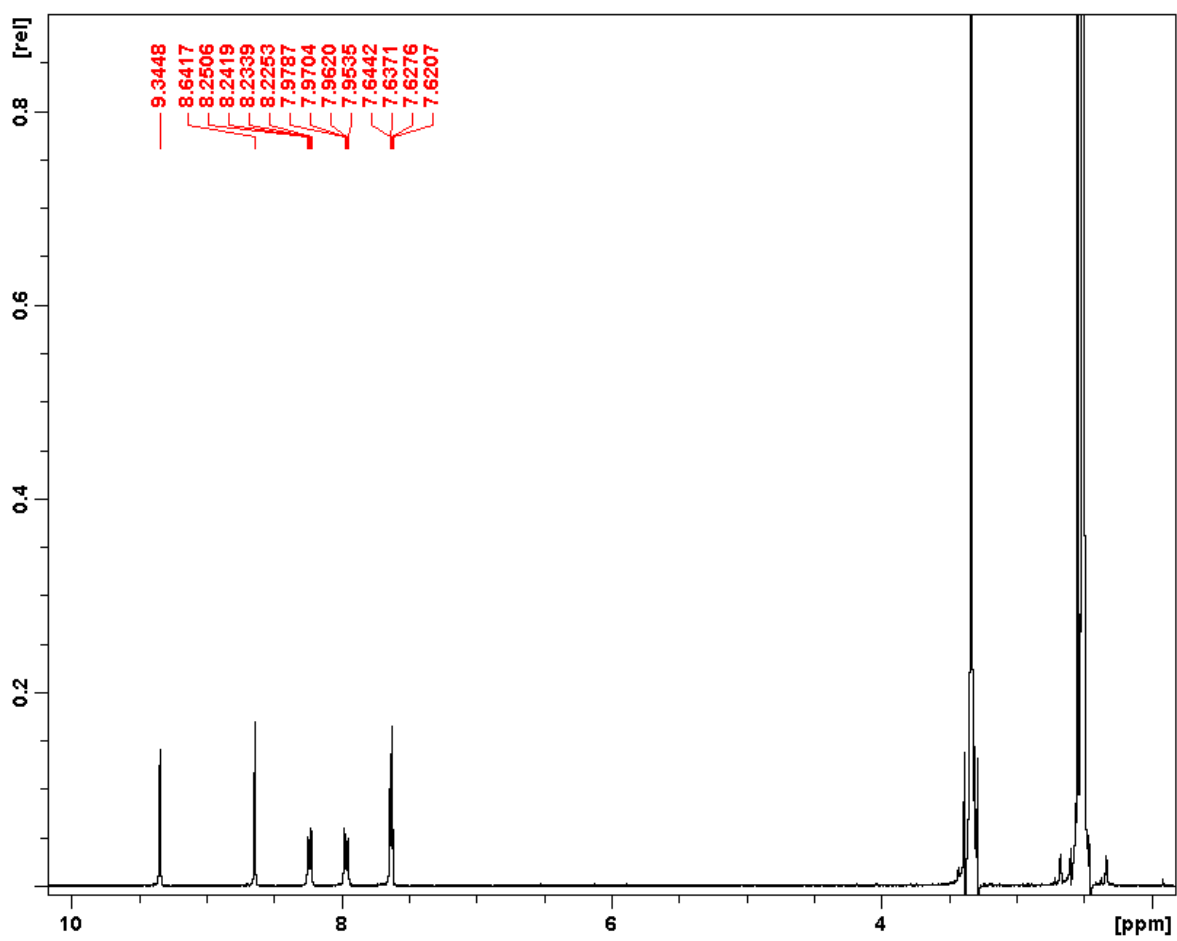

Full NMR trace (DMSO-*d*<sub>6</sub>)

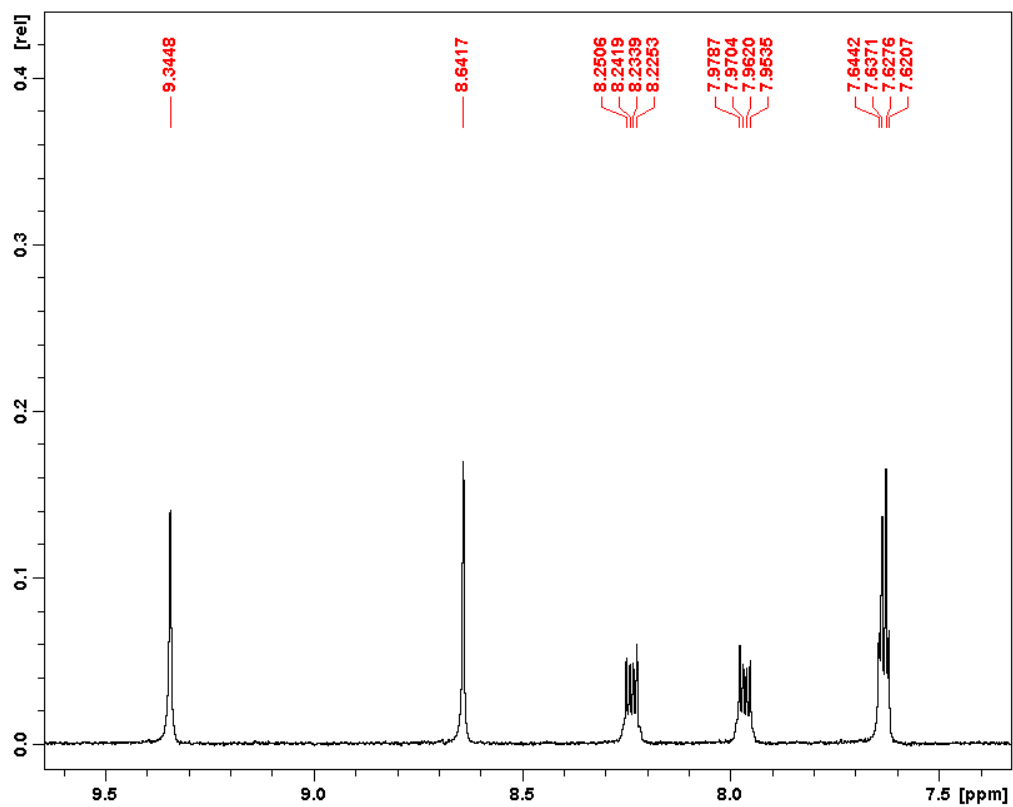

Aromatic region (DMSO- $d_6$ )

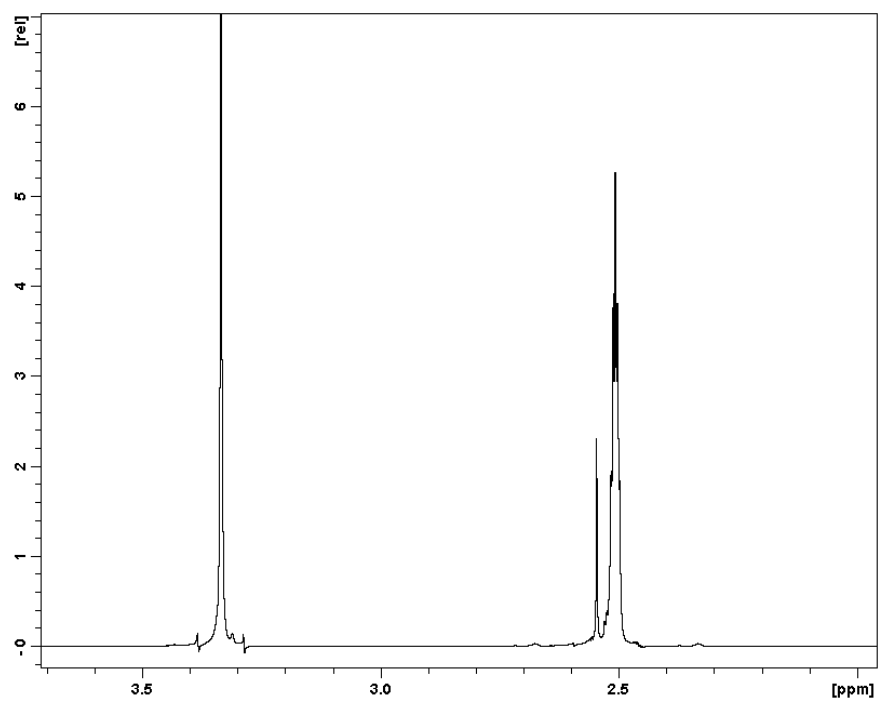

Aliphatic region: the peak at  $\delta = 2.55$  ppm indicates a DMSO solvent impurity.

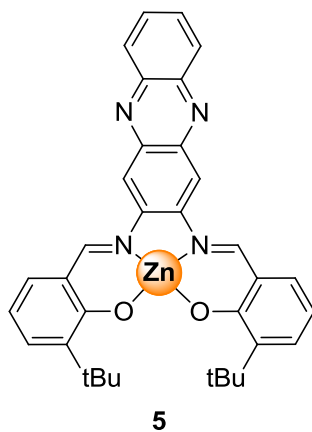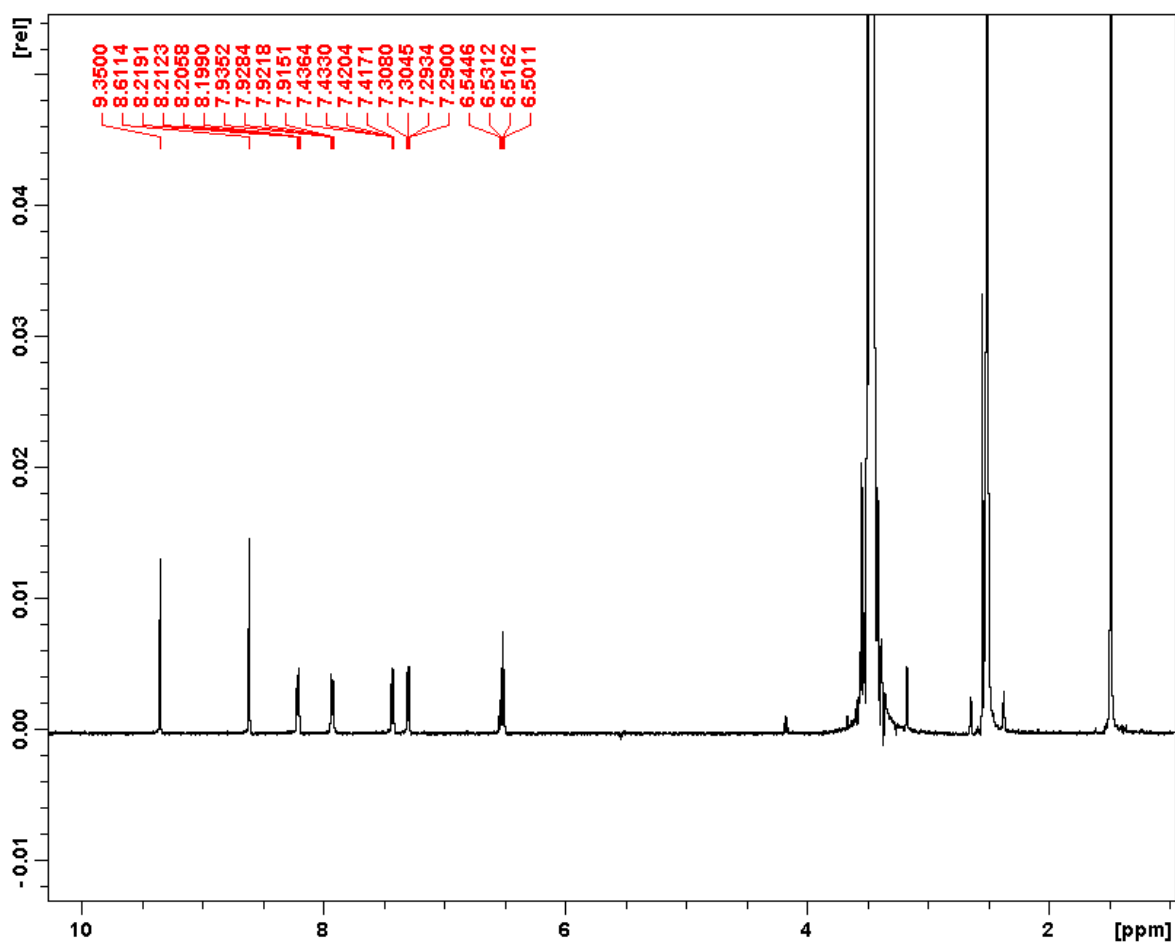

Full NMR trace (DMSO- $d_6$ )

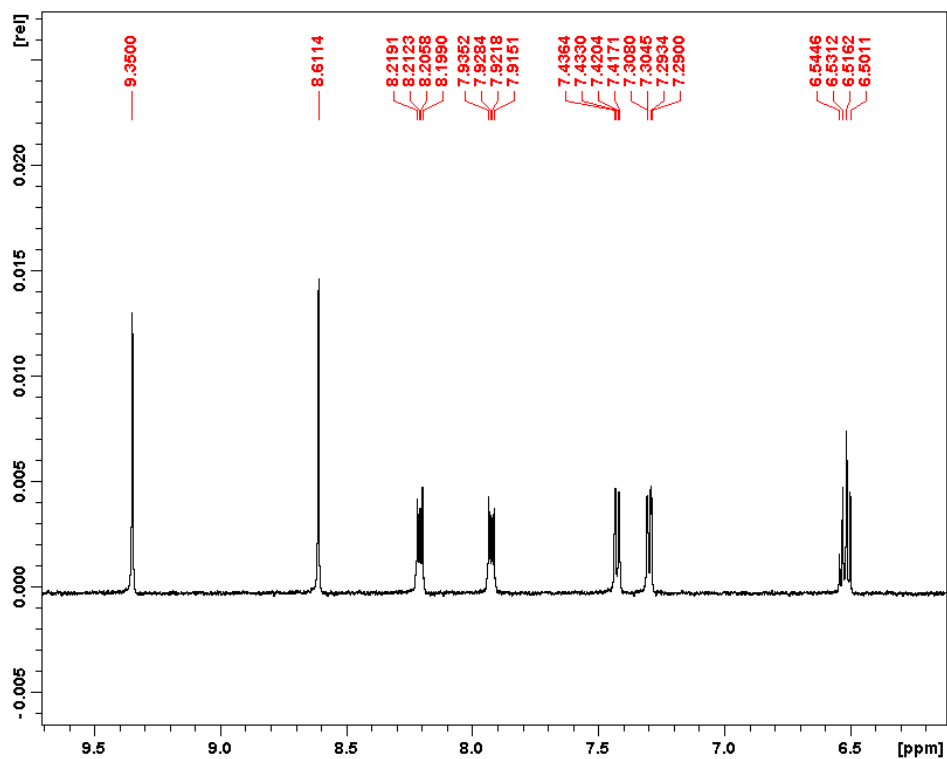

Aromatic region (DMSO- $d_6$ )

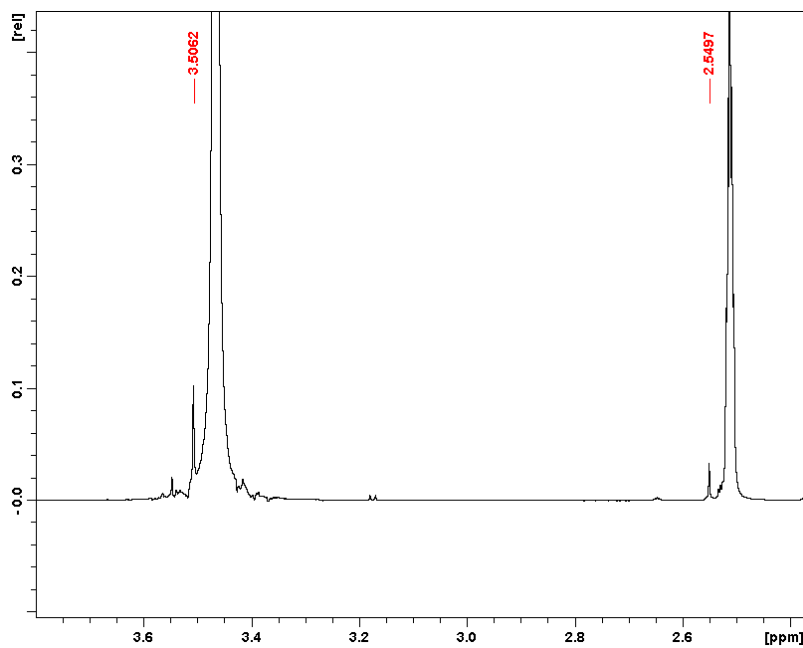

Aliphatic region: the peaks at  $\delta = 3.51$  and 2.55 ppm indicate MeOH and DMSO solvent impurities.

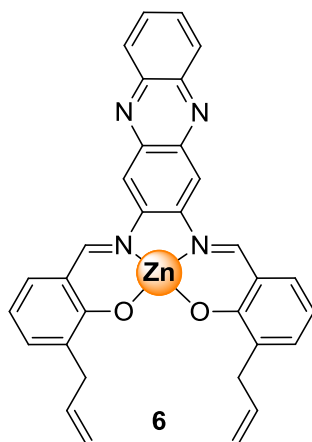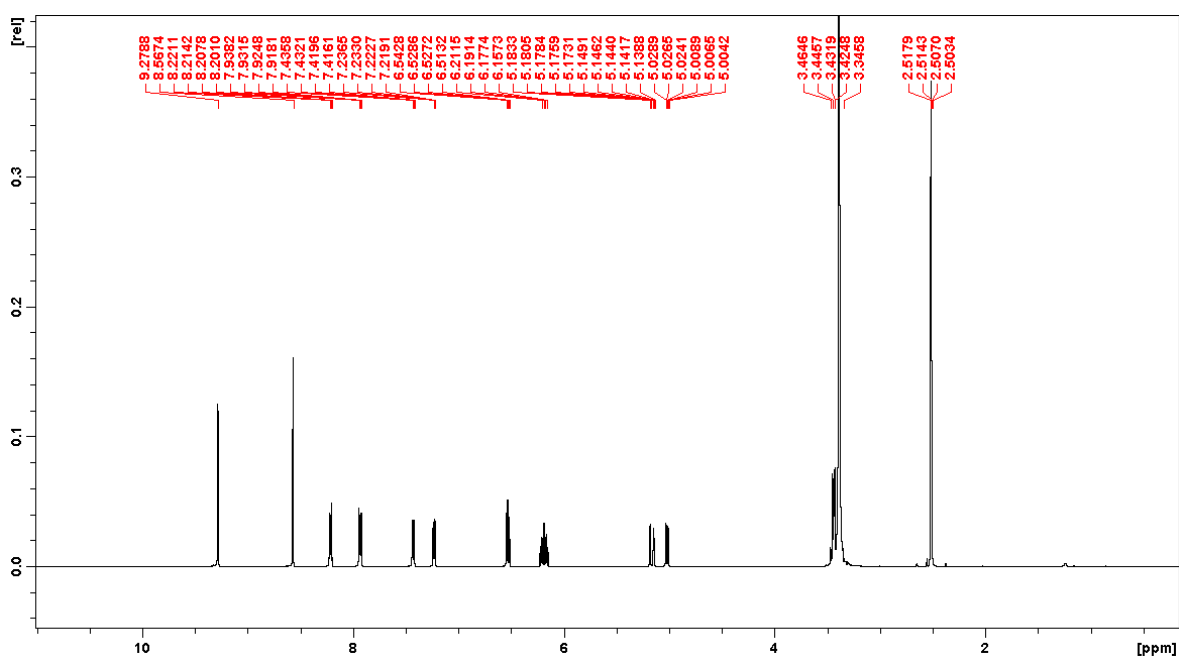

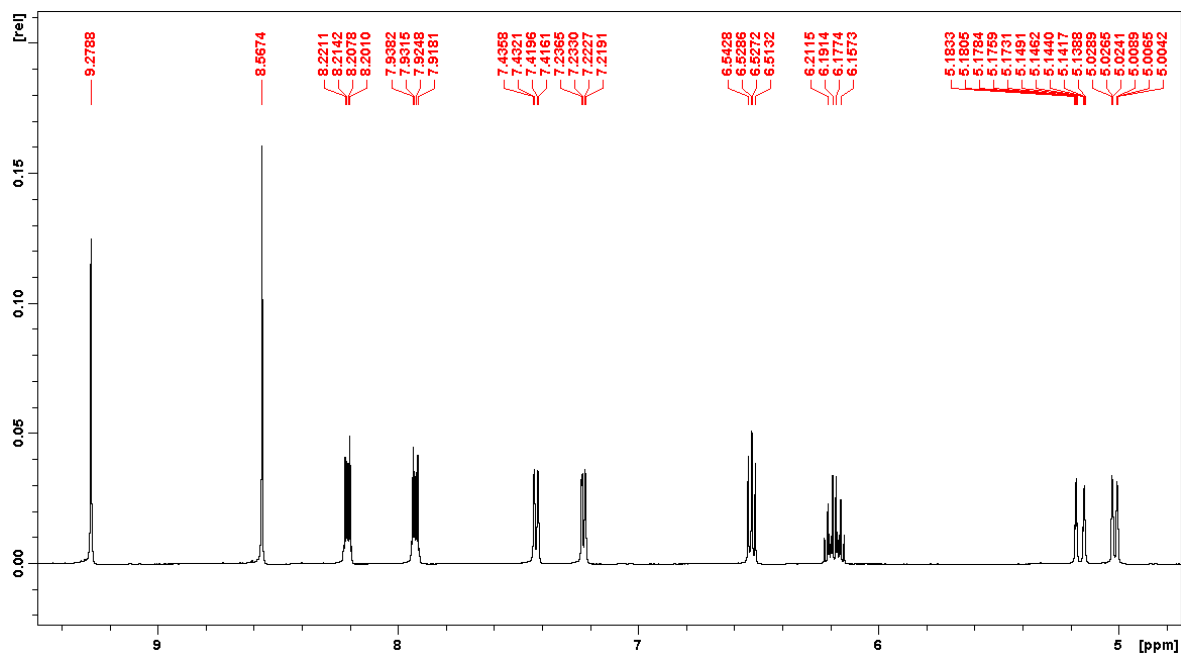

Aromatic region (DMSO- $d_6$ )

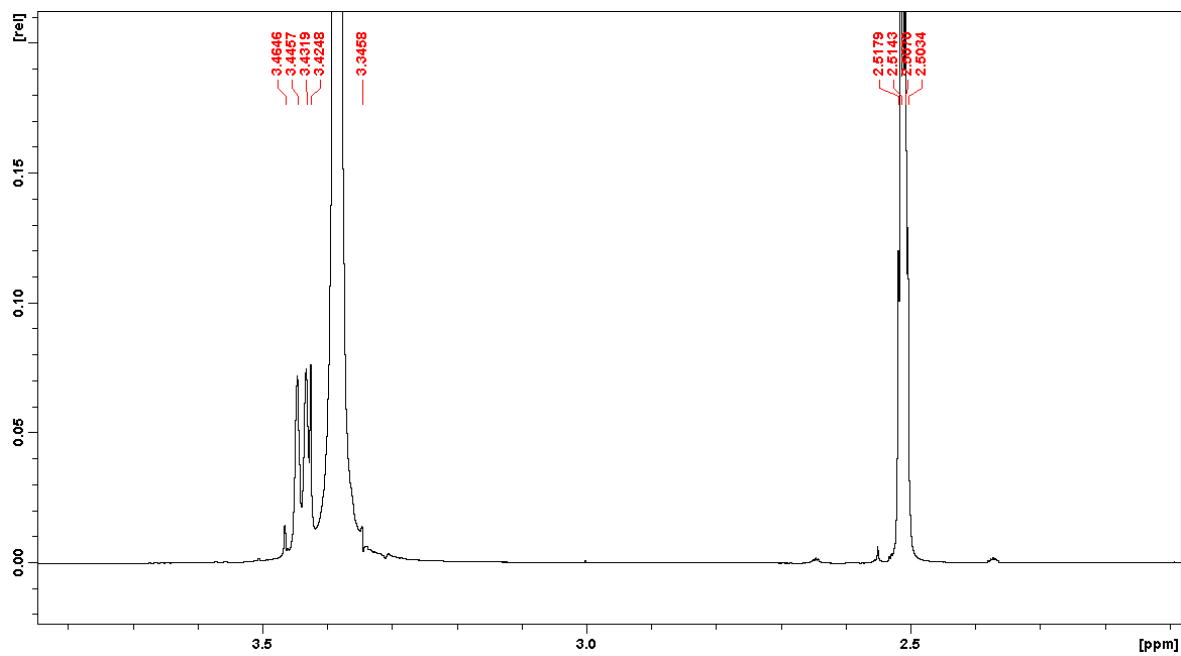

Aliphatic region: the peaks around 3.44 ppm indicate a MeOH solvent impurity.

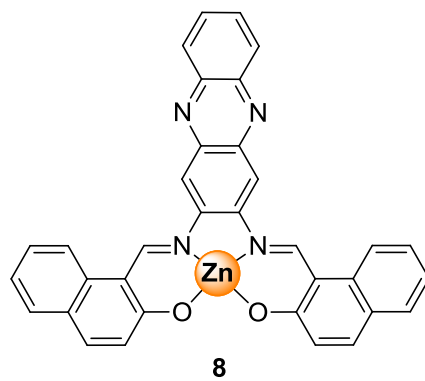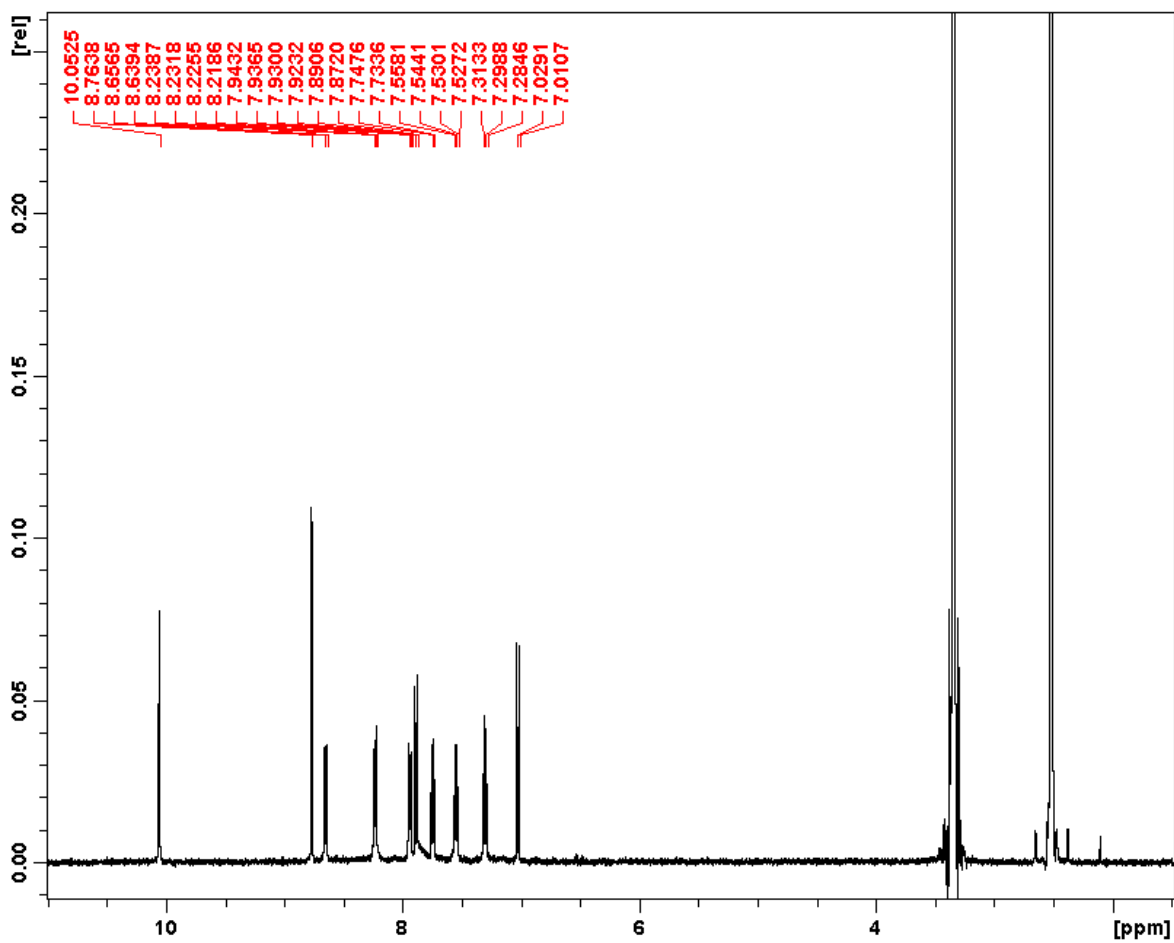

Full NMR trace (DMSO- $d_6$ )

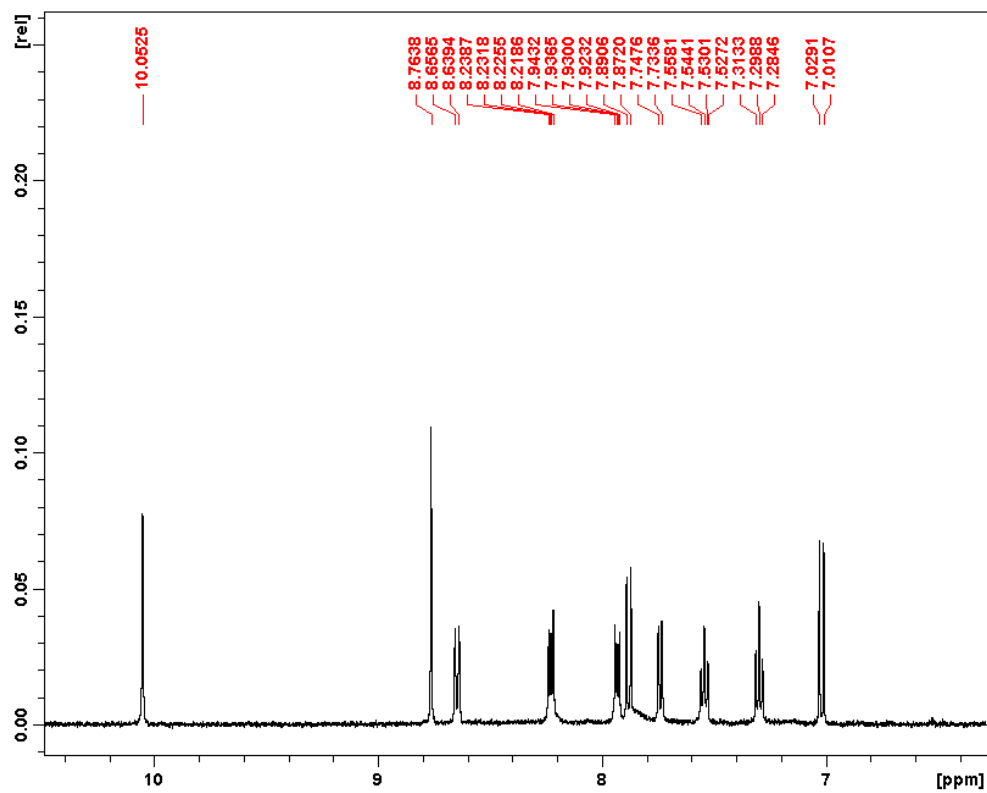

Aromatic region (DMSO-*d*<sub>6</sub>)

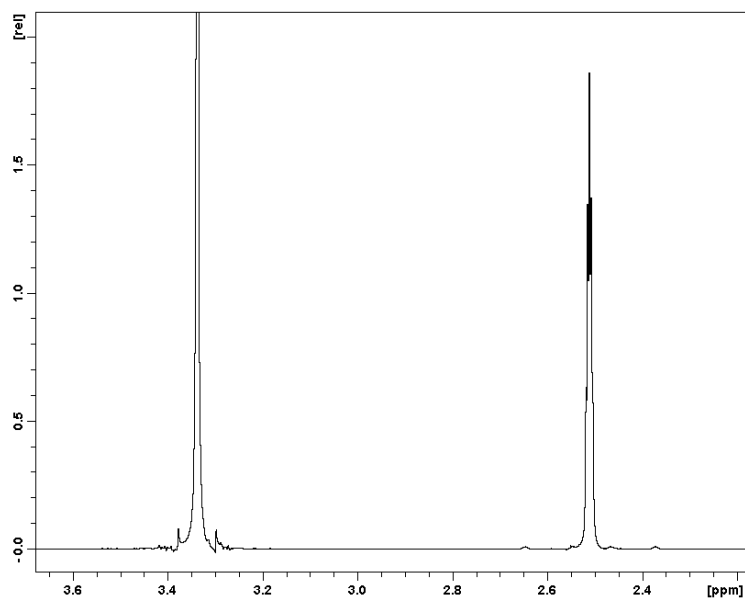

Aliphatic region (DMSO-*d*<sub>6</sub>): no sign of DMSO/MeOH impurities.



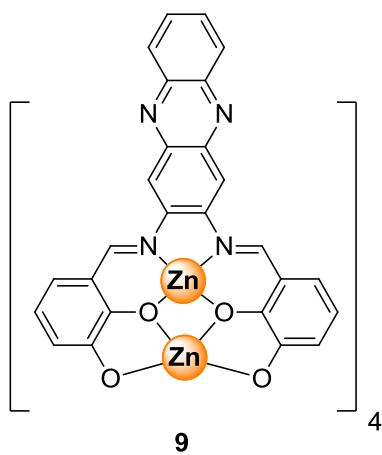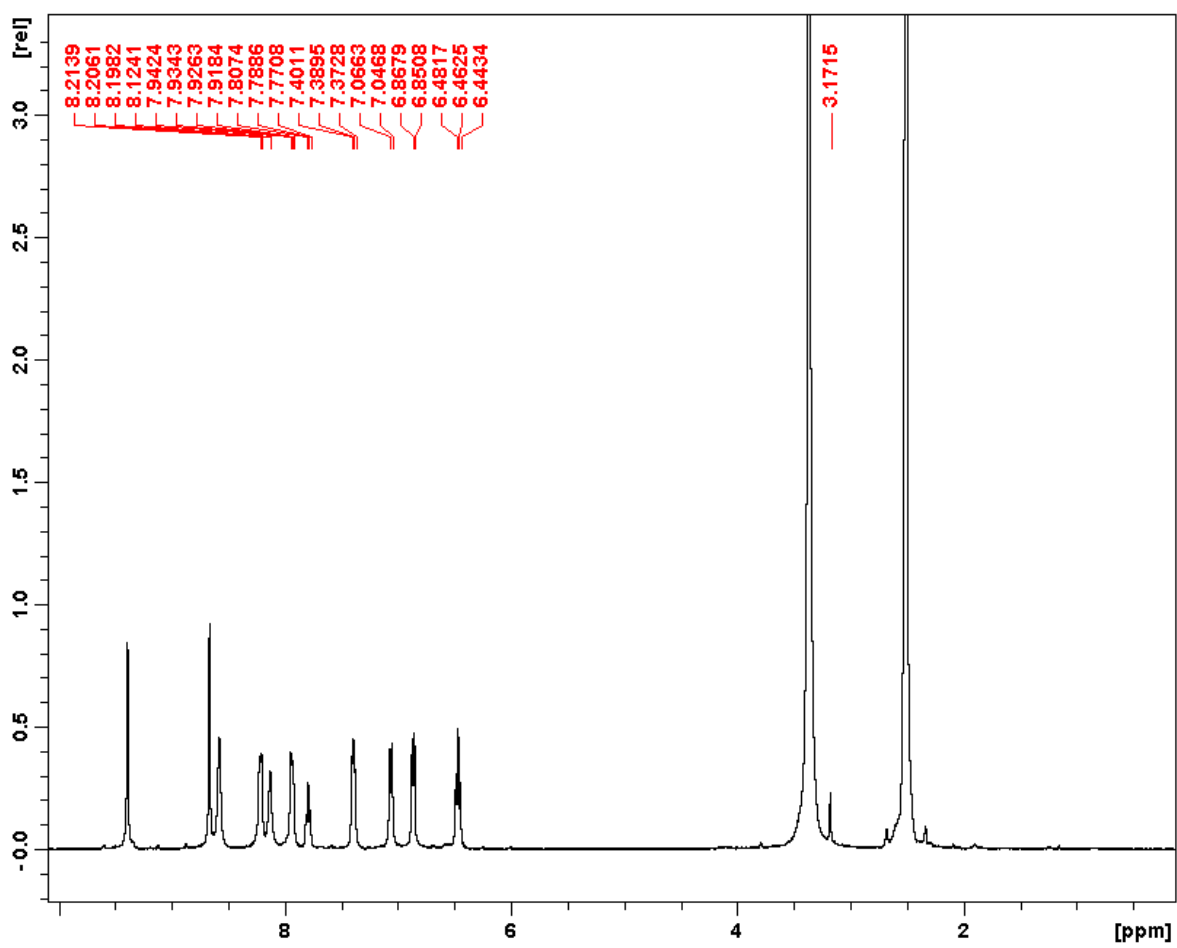

Full NMR trace (DMSO- $d_6$ )

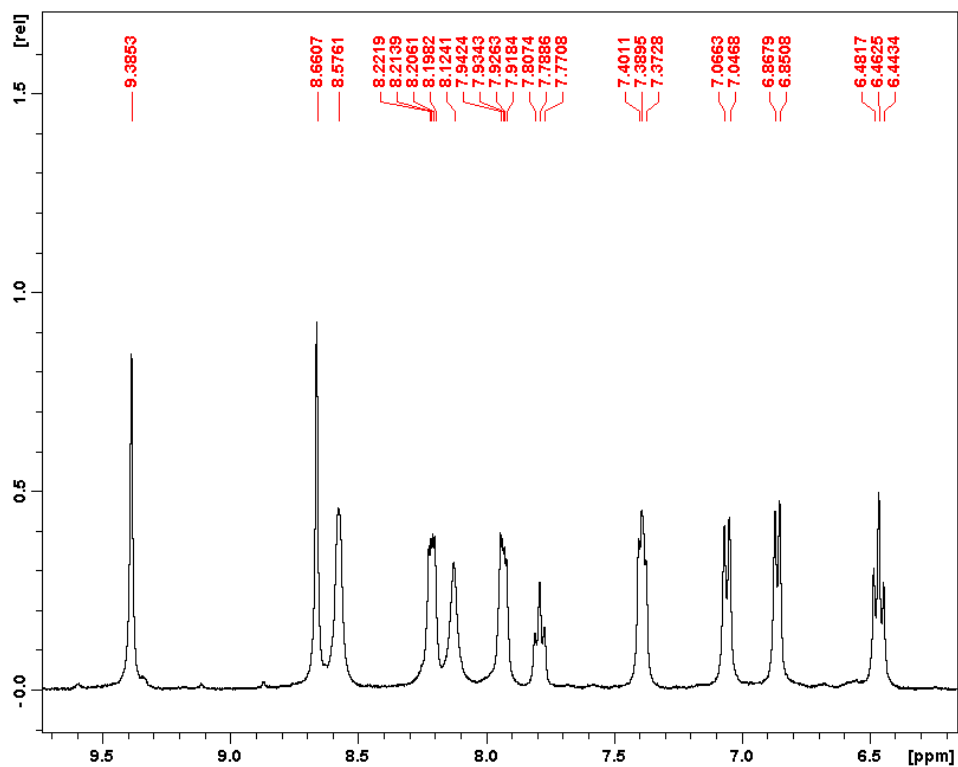

Aromatic region (DMSO-*d*<sub>6</sub>)

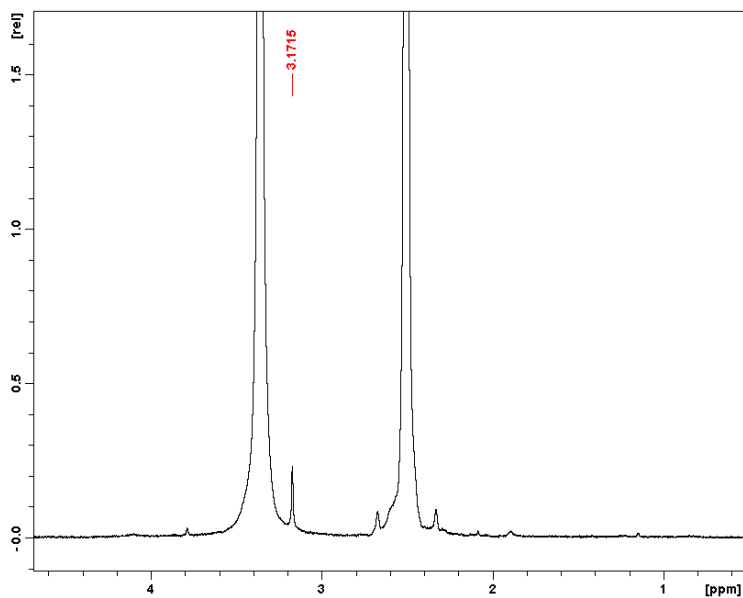

Aliphatic region (DMSO-*d*<sub>6</sub>): MeOH impurity located at  $\delta = 3.17$  ppm.

## Representative MALDI(+) MS spectra:

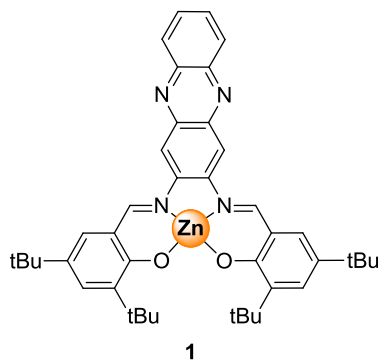

Chemical Formula:  $C_{42}H_{48}N_4O_2Zn$   
Exact Mass: 704,31  
Molecular Weight: 706,24

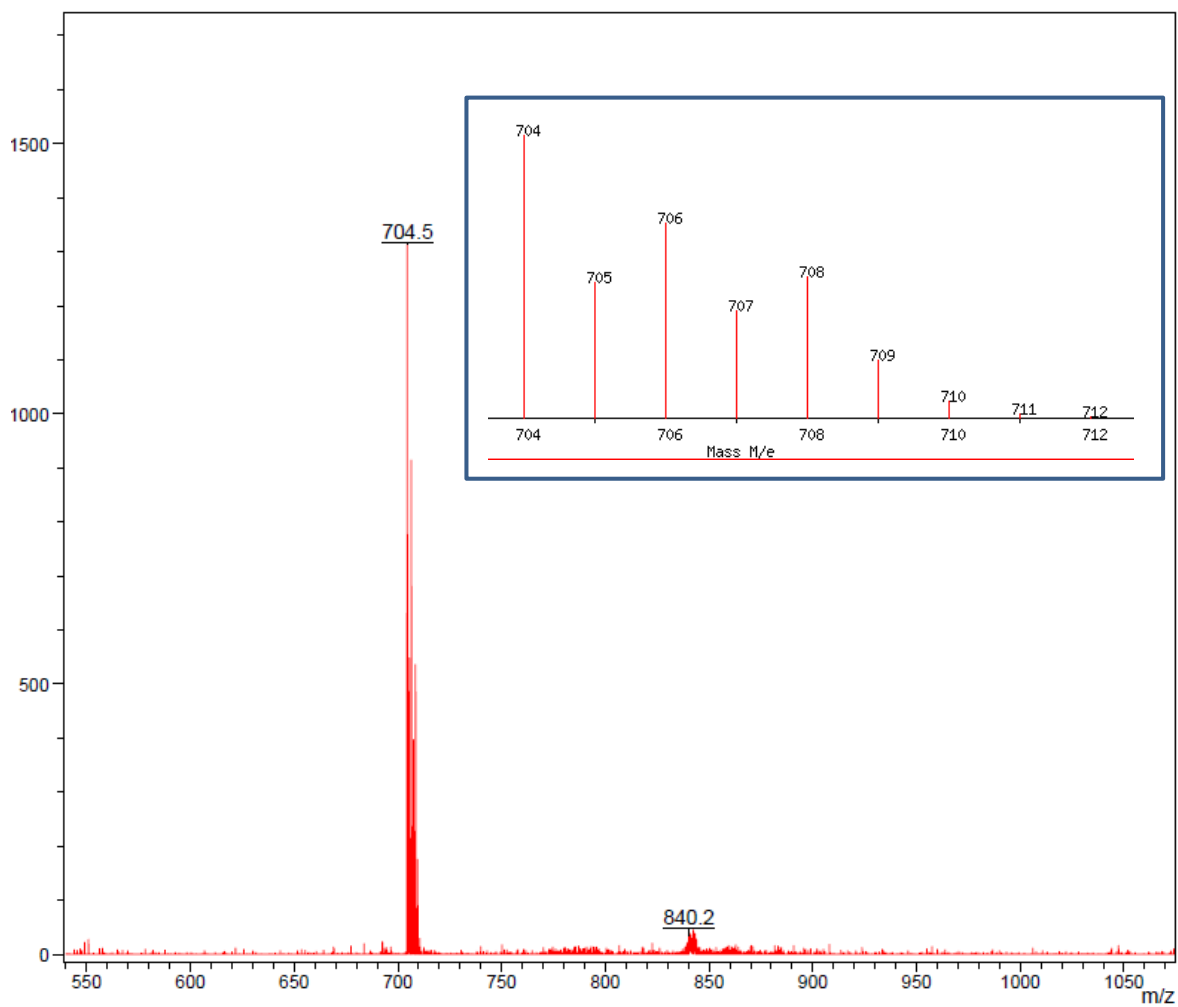

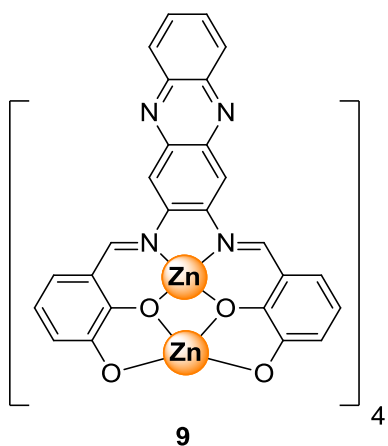

Chemical Formula:  $C_{104}H_{56}N_{16}O_{16}Zn_8$   
Exact Mass: 2295,84  
Molecular Weight: 2308,70

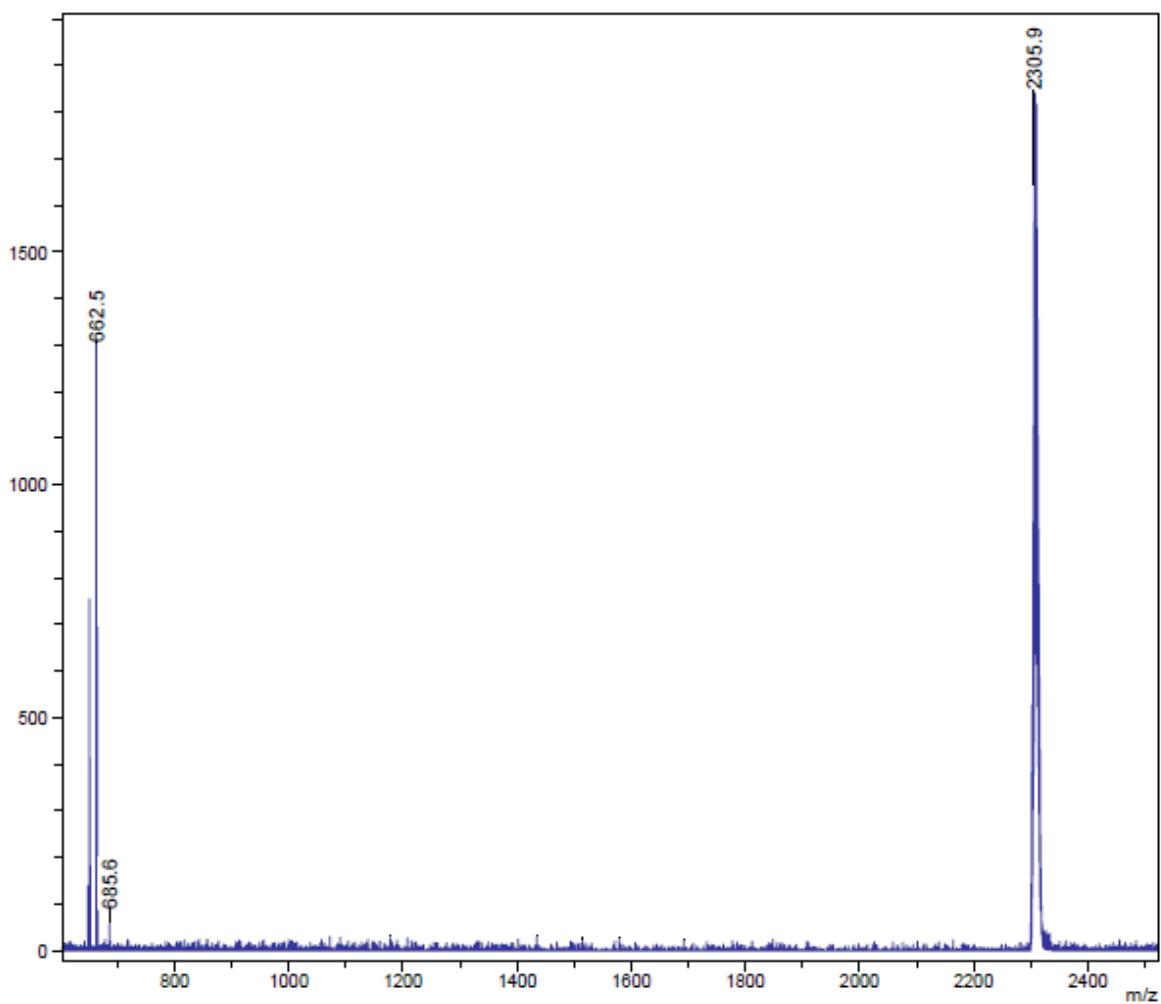

Full trace; zoom on the next page.

Zoom of the main peak around  $m/z$  2300: below the simulated pattern for complex **9**.

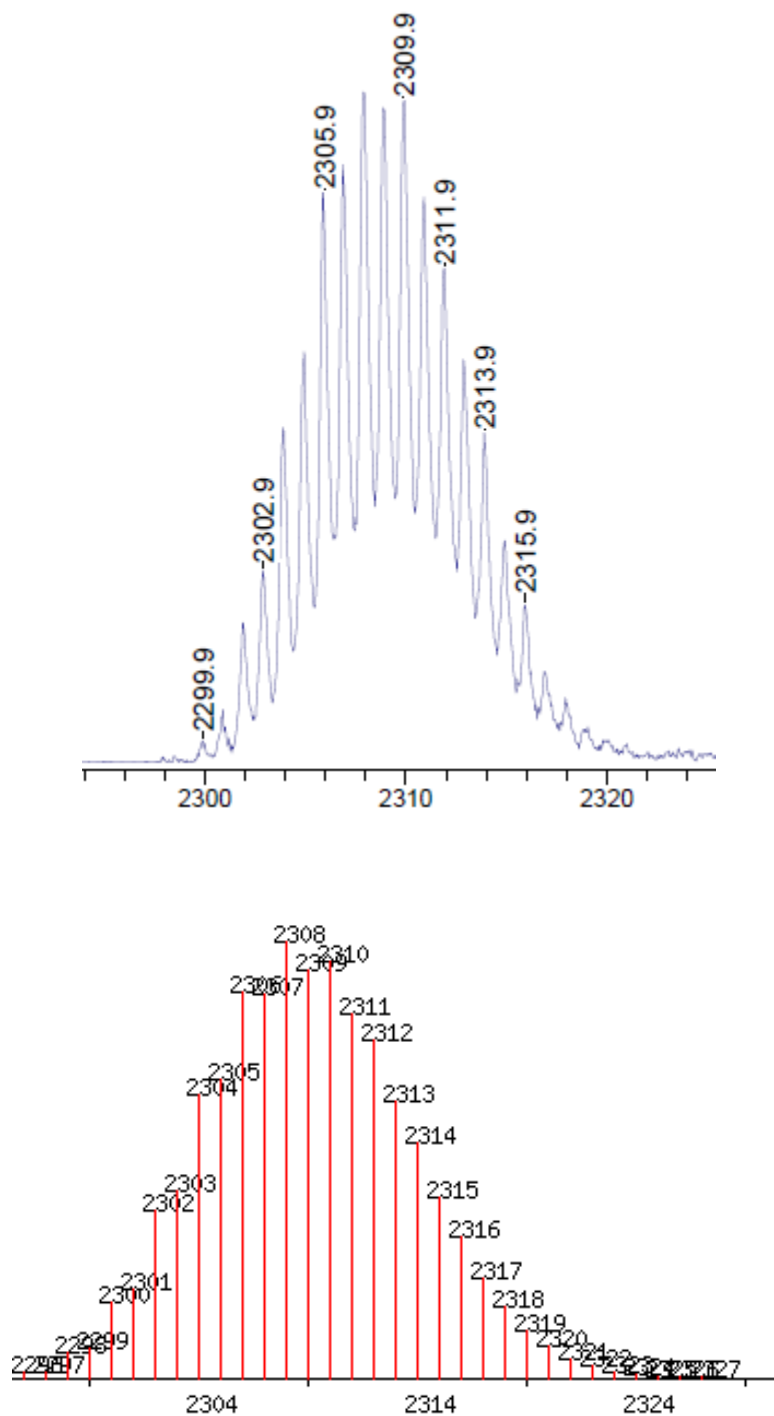

Supplement: c3dt52034j.pdf [file c3dt52034j.pdf]
